# Supplementary material
Source: publisher site journal article supplement (https://mycokeys.pensoft.net/article/47574/download/suppl/33/)
Supplement: Supplementary file 1

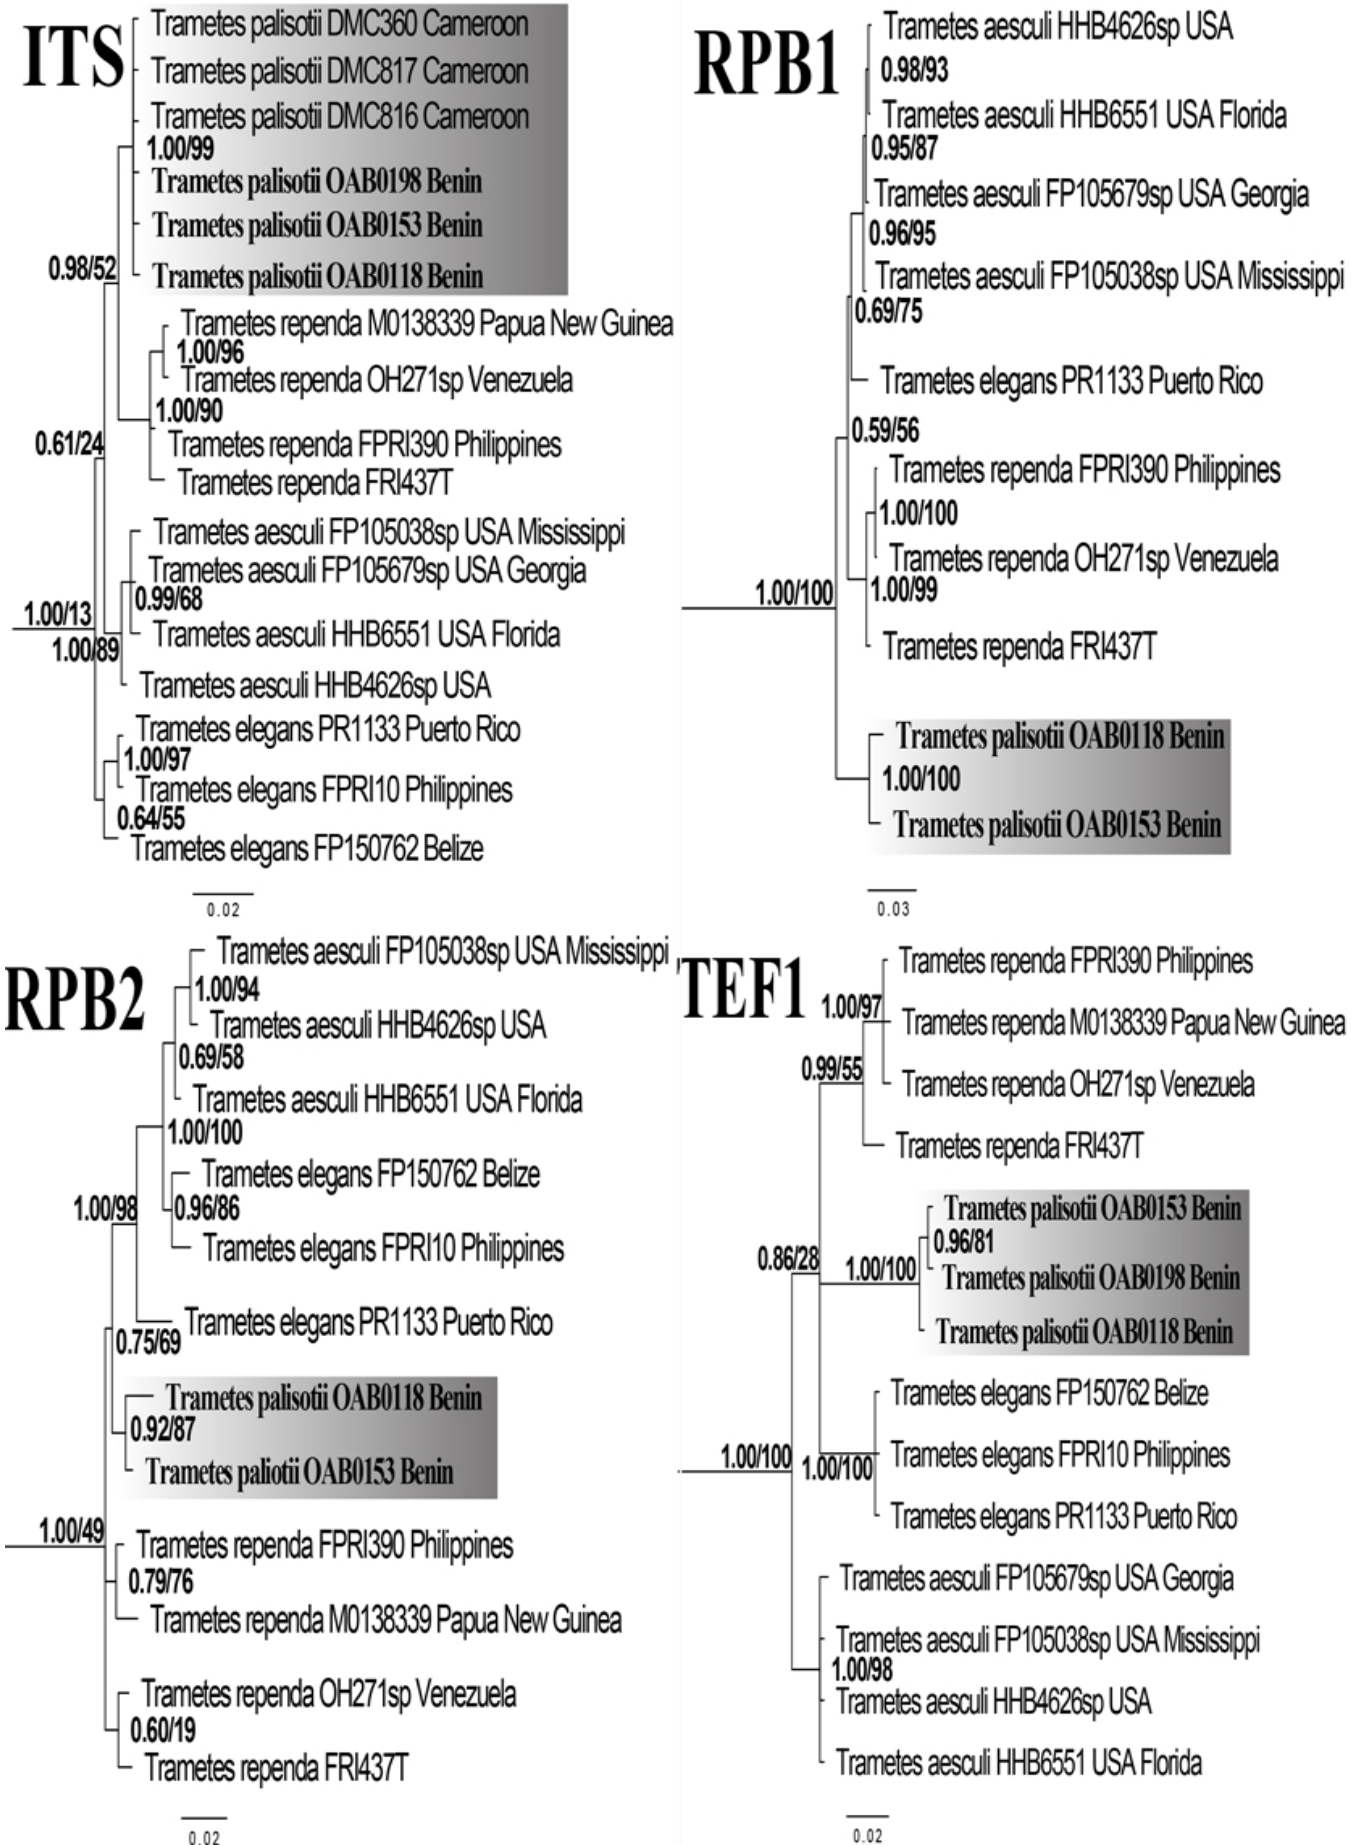

Supplementary file 3. ML phylogeny of *Trametes elegans* species complex as recovered from four individual gene regions. Support values are given as PP/BS. Taxon names are followed by the voucher or stain numbers and the country of origin. The clade formed by the sequences of *T. elegans* from tropical Africa are highlighted in grey
